# Supplementary material
Source: MDPI journal article supplement (https://www.mdpi.com/1999-4907/13/12/2167)

**Figure S1.** Cell wall components and saccharification efficiency in stems of 3-month-old *ugt72b37* poplar mutants and WT. **A.** Percentage of cell wall residues (CWR), lignin composition (S, G, and H units) and yield of monomers in WT and *ugt72b37* mutants (L6, L11 and L16 lines). \*: significant difference (T-Test,  $p < 0.05$ ) compared with the WT. **B.** Crystalline cellulose content (% CWR). **C.** Saccharification efficiency determined by analyzing the glucose content of the CWR after soft acid treatment with HCl 1M. Values are means  $\pm$  SE of 5, 5, 2 and 4 biological replicates for WT, L16, L11, and L6, respectively; with 2 technical replicates. A T-Test was performed in B. and C. (except for L11 because of a low number of biological replicates), and no significant difference between the WT and the *ugt72b37* mutants were measured.

**A.**

|                                       | WT                  | L16                   | L11                 | L6                    |
|---------------------------------------|---------------------|-----------------------|---------------------|-----------------------|
| CWR (%)                               | 89.08 $\pm$ 0.60    | 88.59 $\pm$ 0.40      | 89.31 $\pm$ 0.20    | 90.09 $\pm$ 0.60      |
| H ( $\mu\text{mol/g}$ CWR)            | 3.26 $\pm$ 0.33     | 3.46 $\pm$ 0.16       | 3.75 $\pm$ 0.24     | 3.58 $\pm$ 0.05       |
| G ( $\mu\text{mol/g}$ CWR)            | 172.70 $\pm$ 3.77   | 172.67 $\pm$ 2.85     | 181.54 $\pm$ 0.97   | 174.44 $\pm$ 3.56     |
| S ( $\mu\text{mol/g}$ CWR)            | 328.00 $\pm$ 5.94   | 337.35 $\pm$ 4.90     | 342.45 $\pm$ 3.24   | 332.73 $\pm$ 3.41     |
| H + G + S ( $\mu\text{mol/g}$ CWR)    | 503.96 $\pm$ 9.81   | 513.49 $\pm$ 9.80     | 527.74 $\pm$ 3.55   | 510.75 $\pm$ 7.88     |
| CASA lignin content (%)               | 21.31 $\pm$ 0.34    | 23.75 $\pm$ 0.65 *    | 24.10 $\pm$ 0.80    | 23.37 $\pm$ 0.53 *    |
| H ( $\mu\text{mol/g}$ lignin)         | 15.28 $\pm$ 1.53    | 14.82 $\pm$ 0.61 *    | 15.55 $\pm$ 1.43    | 15.06 $\pm$ 0.22 *    |
| G ( $\mu\text{mol/g}$ lignin)         | 810.43 $\pm$ 17.70  | 738.87 $\pm$ 10.92 *  | 753.29 $\pm$ 5.68   | 734.50 $\pm$ 17.29 *  |
| S ( $\mu\text{mol/g}$ lignin)         | 1539.18 $\pm$ 27.89 | 1443.52 $\pm$ 18.76 * | 1420.94 $\pm$ 19.00 | 1400.98 $\pm$ 16.59 * |
| H + G + S ( $\mu\text{mol/g}$ lignin) | 2364.89 $\pm$ 46.03 | 2197.21 $\pm$ 29.74 * | 2189.78 $\pm$ 14.75 | 2150.54 $\pm$ 33.17 * |
| S/G ratio                             | 1.89 $\pm$ 0.02     | 1.95 $\pm$ 0.01       | 1.89 $\pm$ 0.04     | 1.91 $\pm$ 0.03       |

**B.**

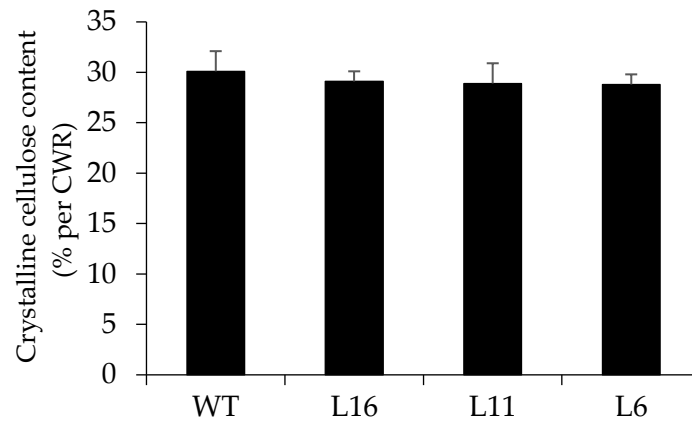

**C.**

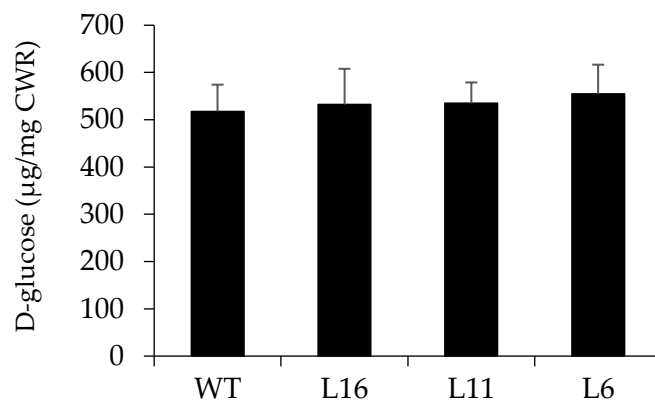

Supplement: s1 [file s1]
